# Supplementary material for: Inhibition of AZIN2-sv induces neovascularization and improves prognosis after myocardial infarction by blocking ubiquitin-dependent talin1 degradation and activating the Akt pathway
Source: PubMed Central journal article supplement — eBioMedicine. 2018 Dec 10;39:69–82. doi: 10.1016/j.ebiom.2018.12.001 (PMC6355659; doi:10.1016/j.ebiom.2018.12.001), 2018-12-10

# Supplemental Figure 1

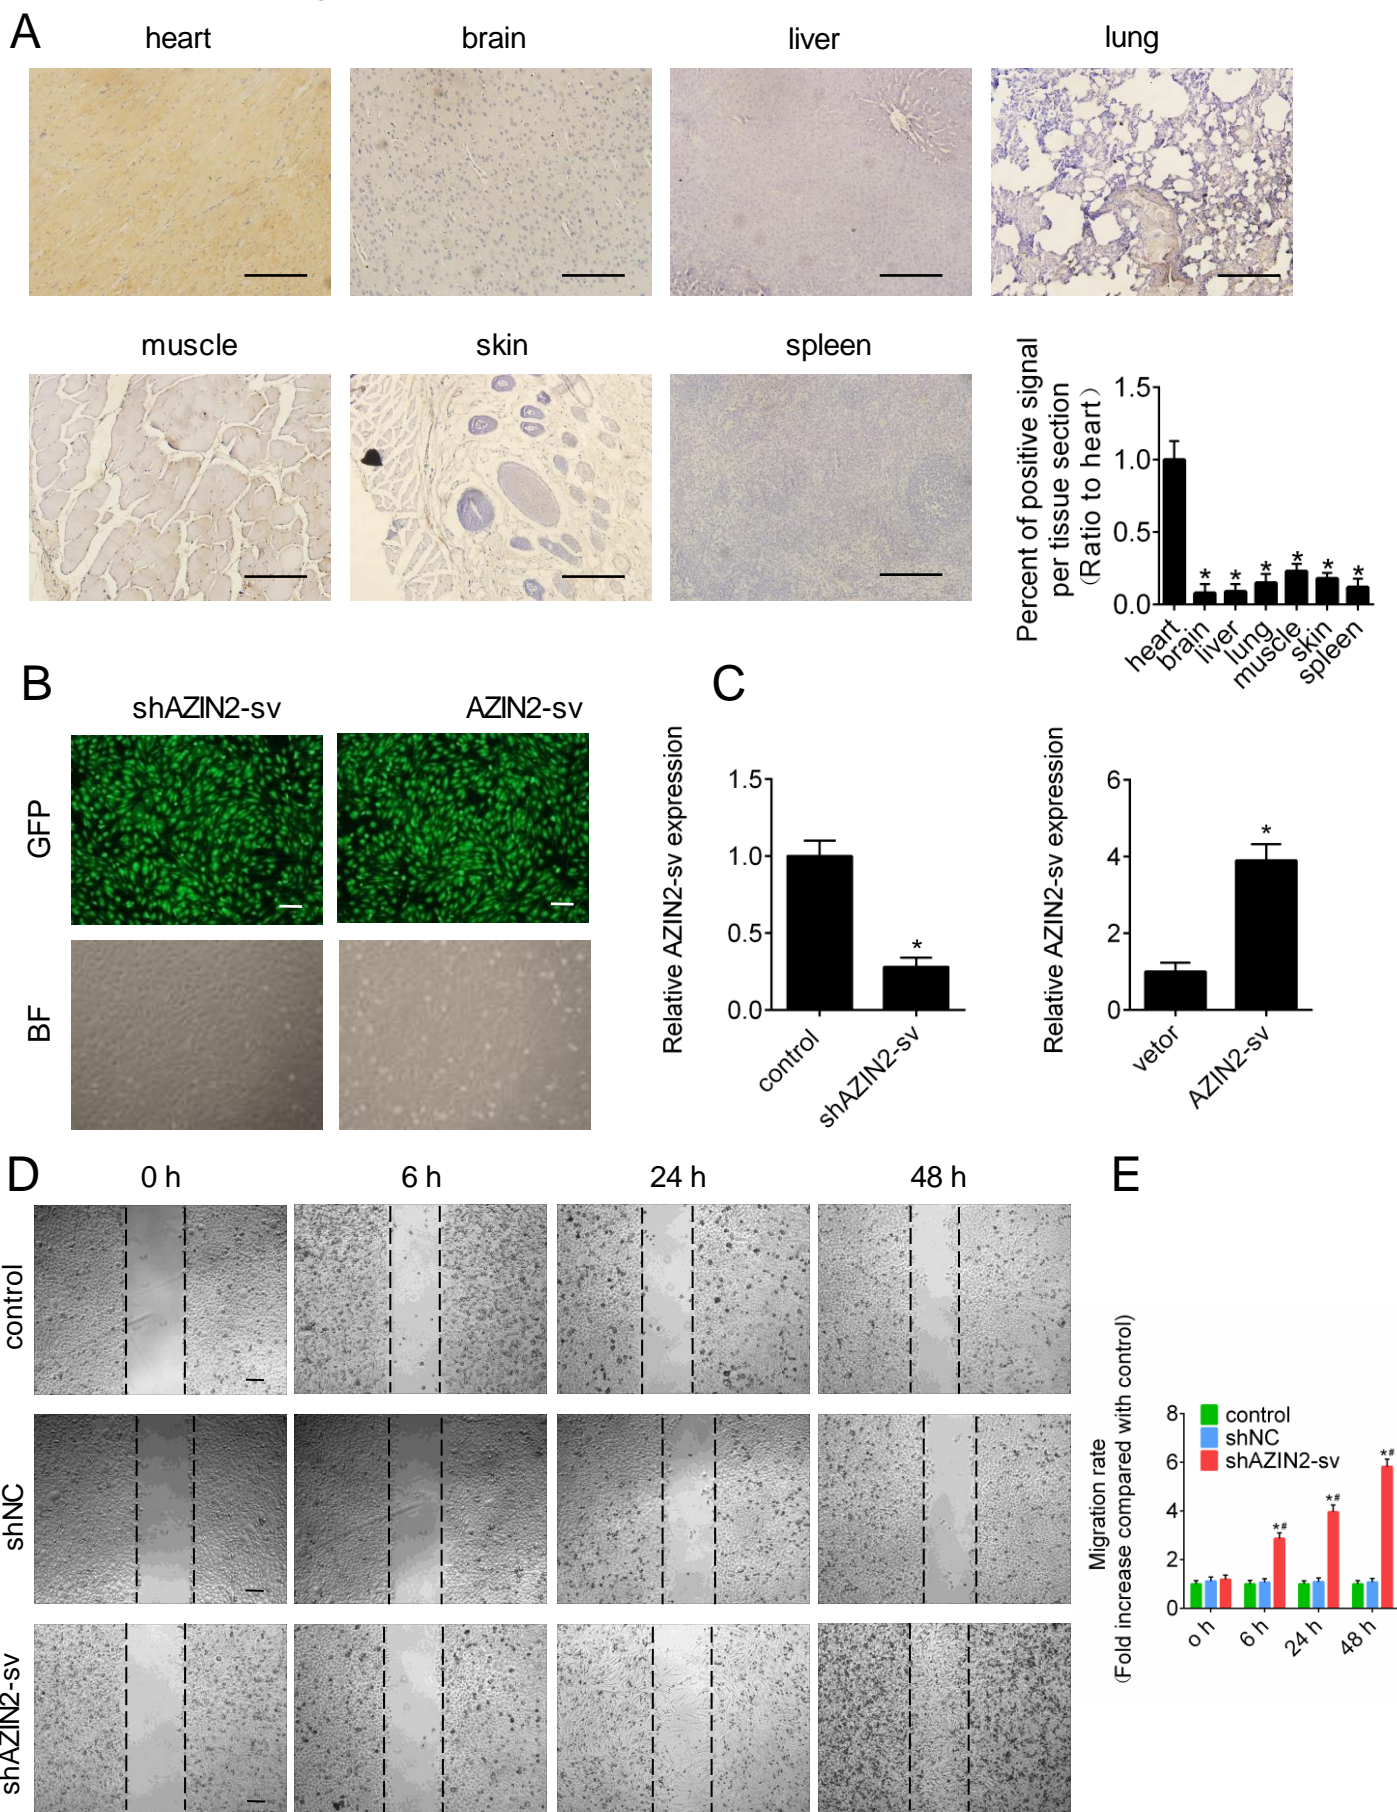

**F**

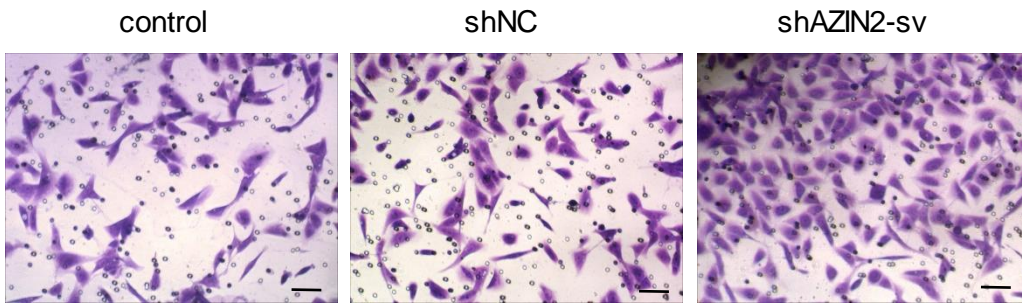

**G**

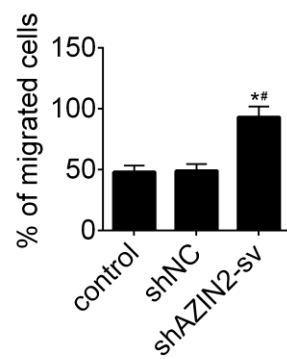

**H**

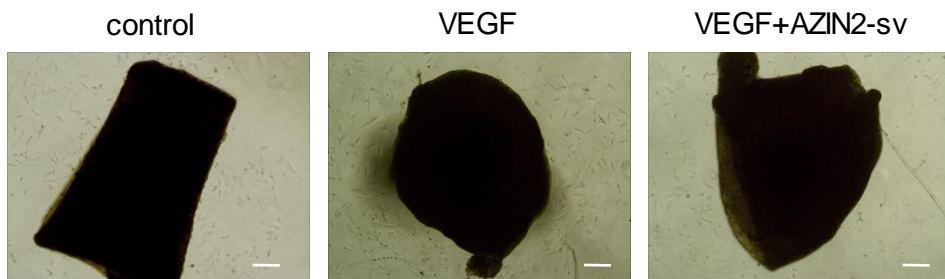

**I**

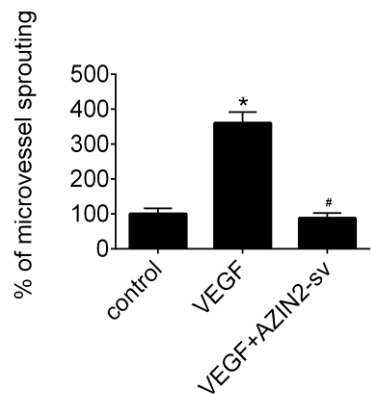

**J**

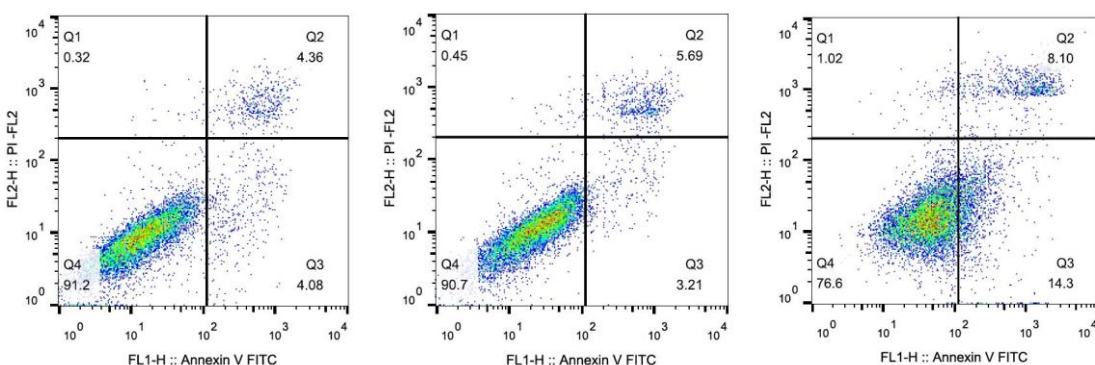

control

vector

AZIN2-sv

**K**

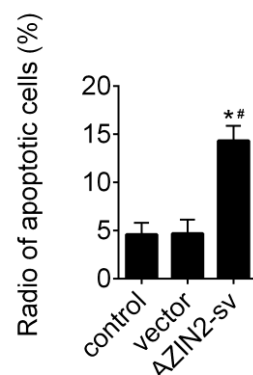

# Supplemental Figure 2

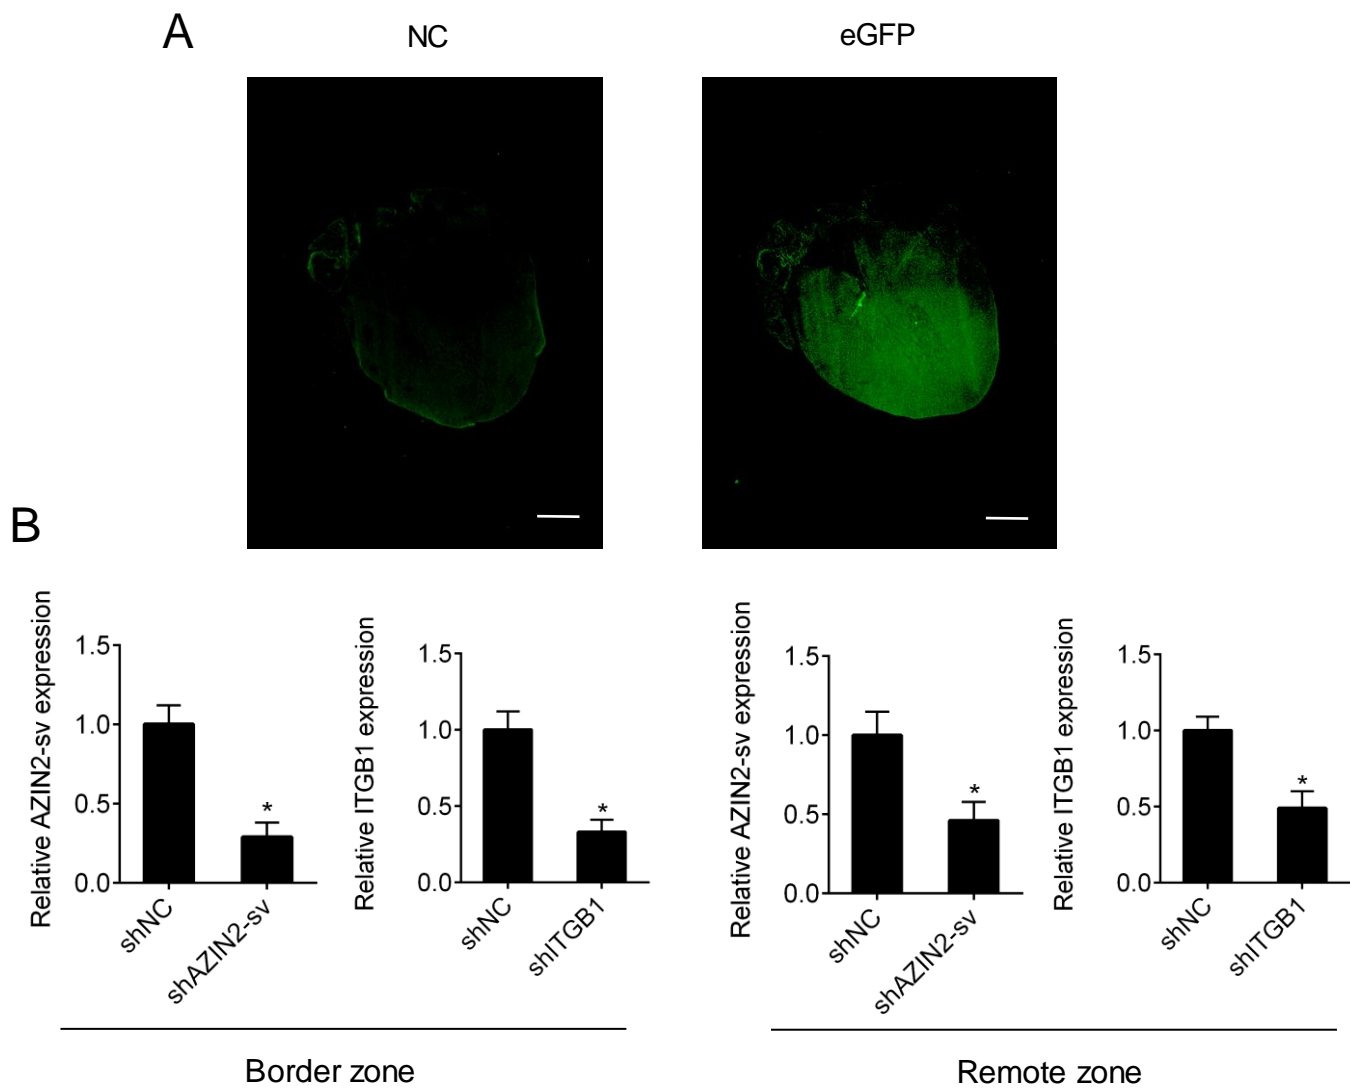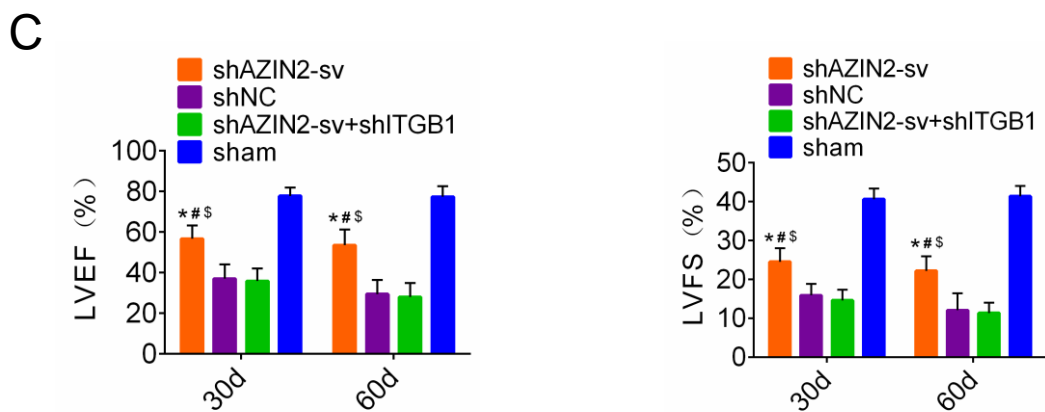

# Supplemental Figure 3

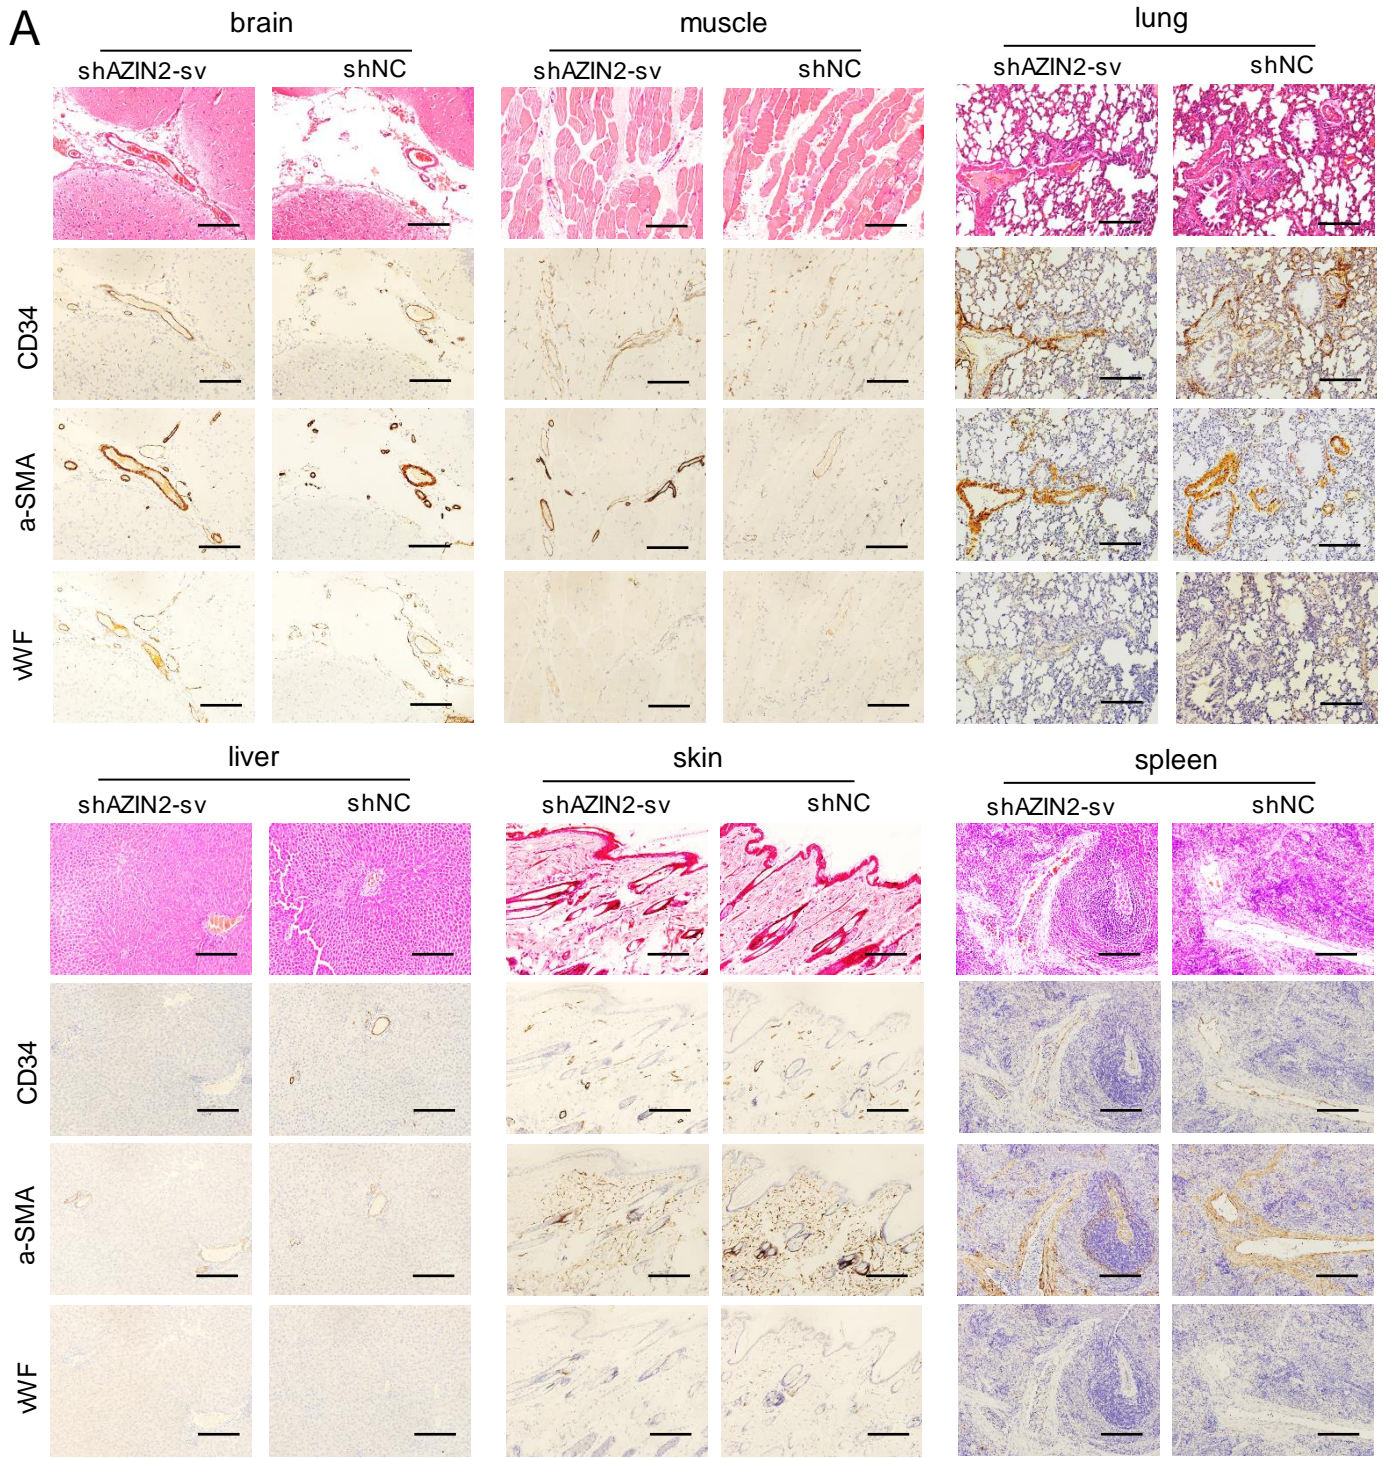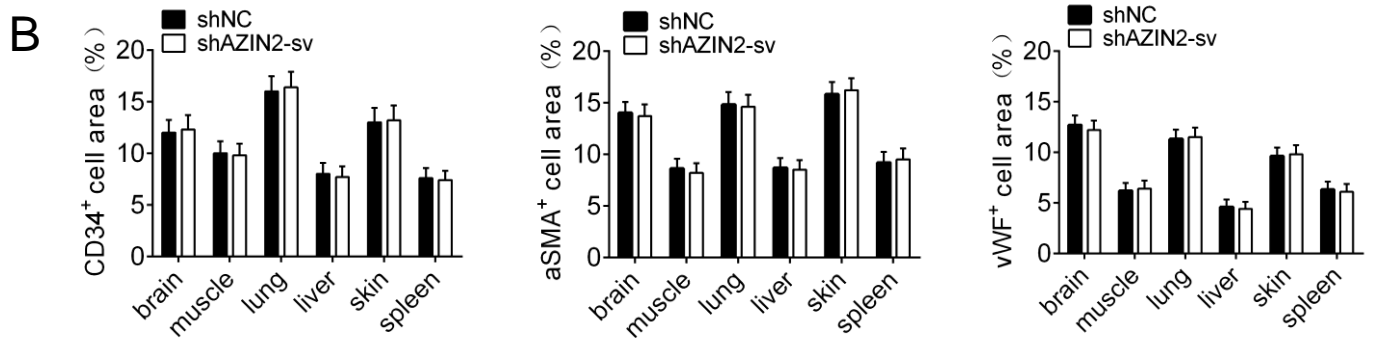

# Supplemental Figure 4

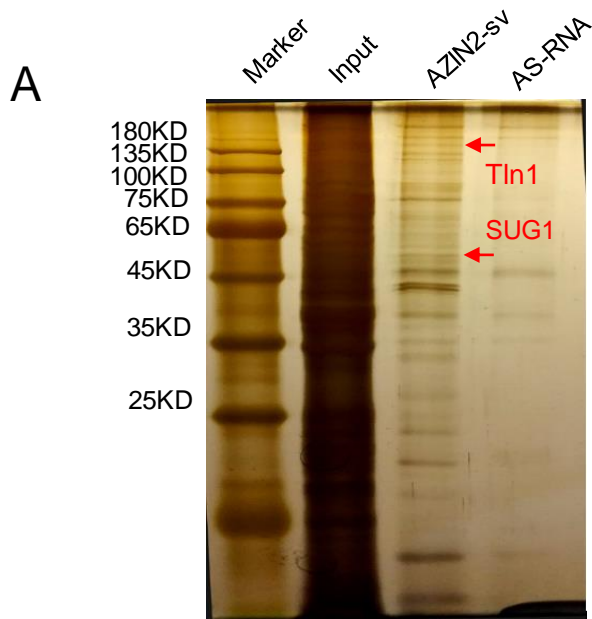

**B**

▼47 **gi|71682403|gb|AA...** 23 Tln1 protein [Rattus norvegicus]

|      | Score                                                    | Mass | Matches | Sequences | emPAI |                                       |
|------|----------------------------------------------------------|------|---------|-----------|-------|---------------------------------------|
| 47.1 | <a href="#">gi 71682403 gb AAI0</a>                      | 23   | 163474  | 3 (1)     | 3 (1) | 0.02 Tln1 protein [Rattus norvegicus] |
|      | ▶6 sameSETS of <a href="#">gi 71682403 gb AAI00263.1</a> |      |         |           |       |                                       |

▼3 peptide matches (3 non-duplicate, 0 duplicate)

Auto-fit to window

| Query Dupes          | Observed | Mr (expt) | Mr (calc) | ppm   | M | Score | Expect | Rank | U | Peptide           |
|----------------------|----------|-----------|-----------|-------|---|-------|--------|------|---|-------------------|
| <a href="#">6</a>    | 351.6926 | 701.3706  | 701.3820  | -16.2 | 1 | 3     | 1      | ▶2   | U | K.AAAREGK.L       |
| <a href="#">580</a>  | 442.2718 | 882.5290  | 882.5287  | 0.33  | 0 | 1     | 1.2    | ▶3   |   | K.LEQLKPR.A       |
| <a href="#">3451</a> | 696.7979 | 1391.5813 | 1391.5800 | 0.88  | 0 | 23    | 0.019  | ▶1   | U | K.ADAEGESDLENSR.K |

**C**

▼11 **gi|1395177|dbj|BA...** 55 proteasomal ATPase (rat SUG1) [Rattus norvegicus]

|      | Score                                                     | Mass | Matches | Sequences | emPAI |                                                        |
|------|-----------------------------------------------------------|------|---------|-----------|-------|--------------------------------------------------------|
| 11.1 | <a href="#">gi 1395177 dbj BAA1</a>                       | 55   | 45768   | 1 (1)     | 1 (1) | 0.07 proteasomal ATPase (rat SUG1) [Rattus norvegicus] |
|      | ▶11 sameSETS of <a href="#">gi 1395177 dbj BAA11938.1</a> |      |         |           |       |                                                        |

▼1 peptide matches (1 non-duplicate, 0 duplicate)

Auto-fit to window

| Query Dupes          | Observed | Mr (expt) | Mr (calc) | ppm  | M | Score | Expect | Rank | U | Peptide          |
|----------------------|----------|-----------|-----------|------|---|-------|--------|------|---|------------------|
| <a href="#">3030</a> | 645.8006 | 1289.5866 | 1289.5848 | 1.45 | 0 | 55    | 1e-005 | ▶1   | U | R.LEGGSGDSEVQR.T |

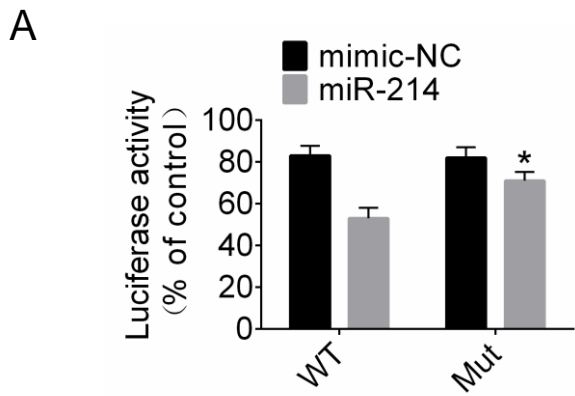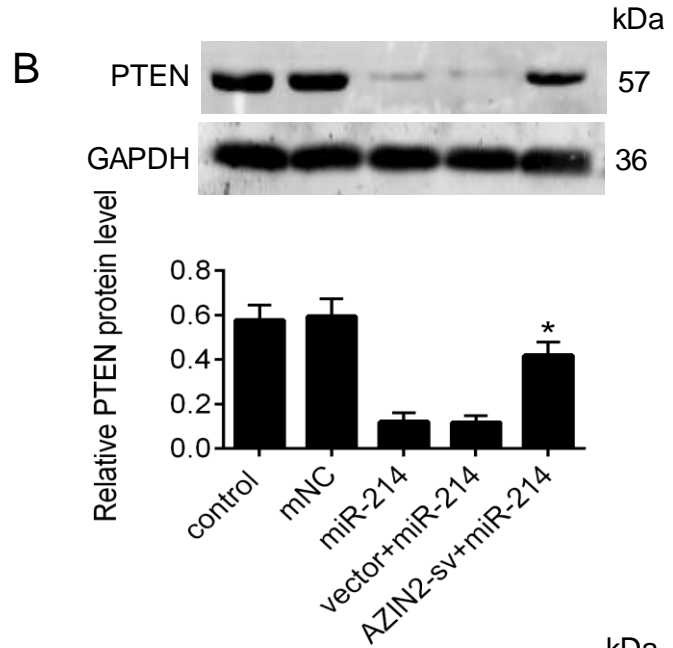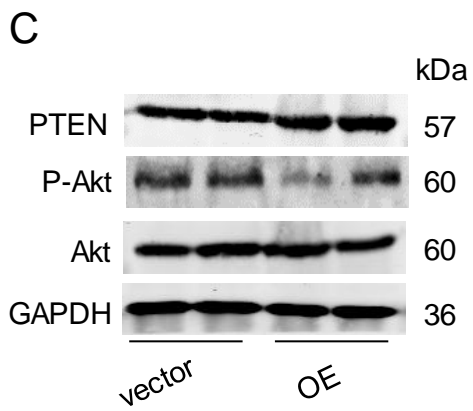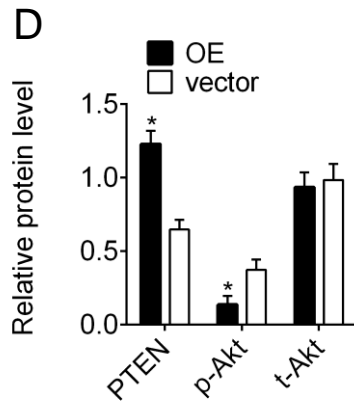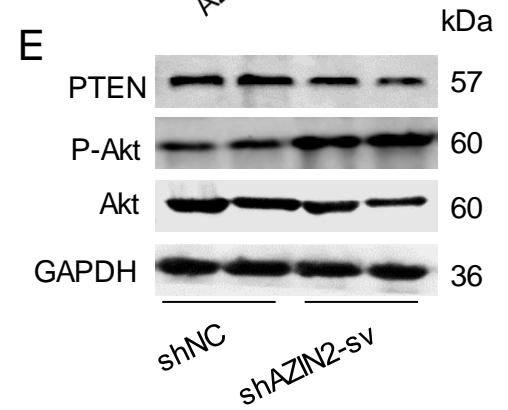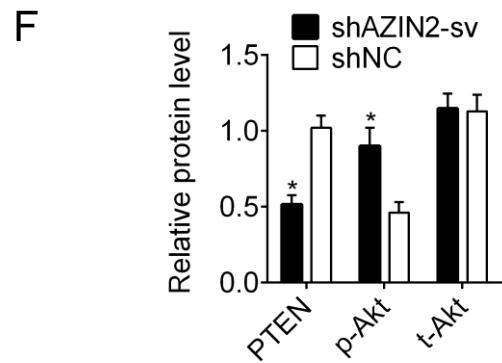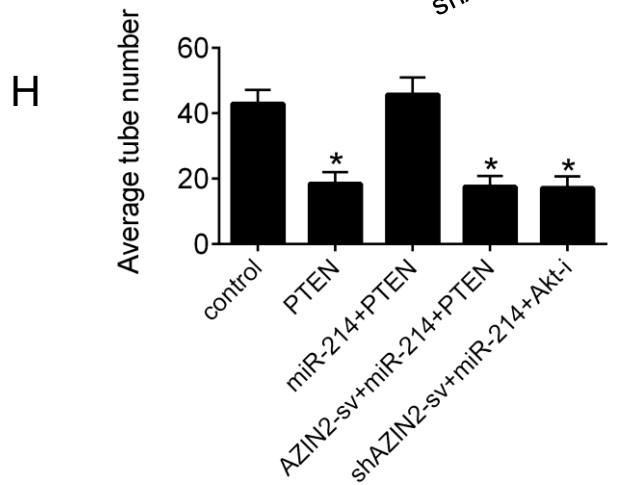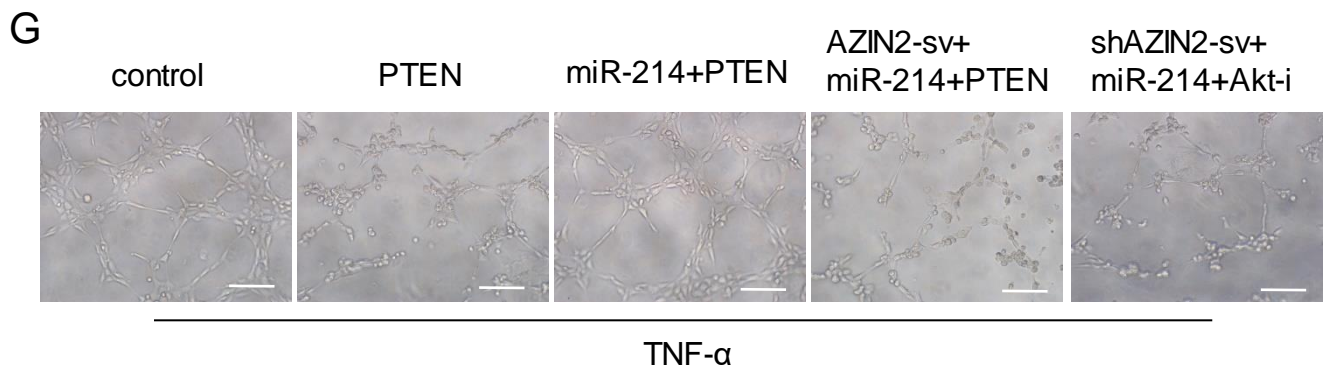

Supplement: mmc1.pdf [file mmc1.pdf]
